# Supplementary material
Source: publisher site journal article supplement (https://www.spandidos-publications.com/1412/downloadSupplementary)

Figure S1. Sample clustering tree. Height was set at 80 to identify outlier samples.

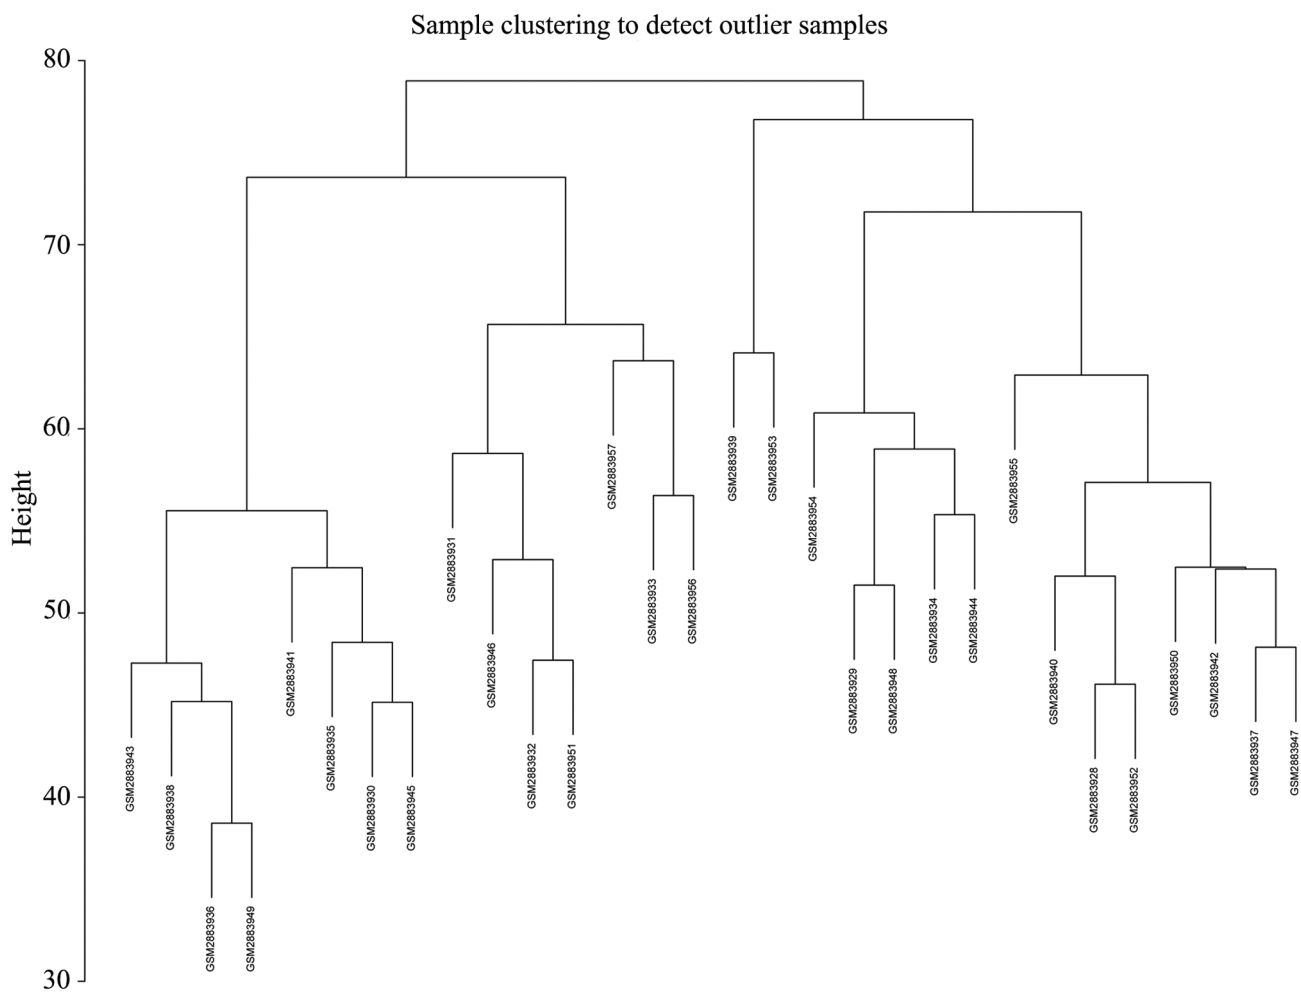

Supplement: Supplementary file 1 [file downloadSupplementary]
